# Supplementary material
Source: Springer Nature journal article supplement (https://www.springermedizin.de/resource/supplementary/12879_2014_3828_MOESM1_ESM.pdf/9446698)

## GROWTH MEDIUM

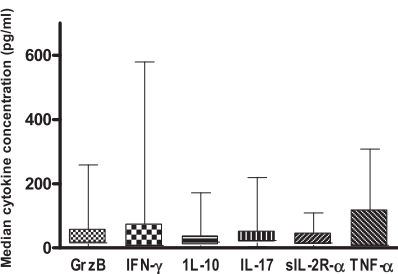

## SEB

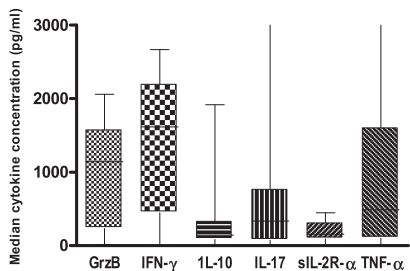

## ESAT-6/CFP-10

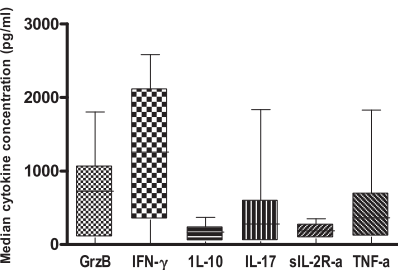

## Rv1733

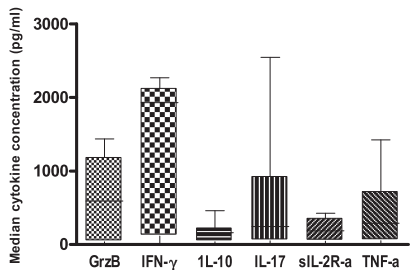

## Rv2029

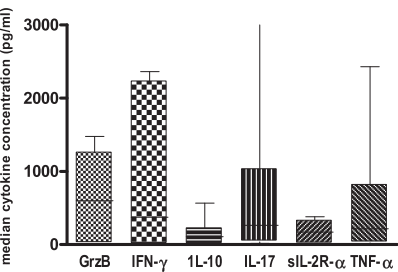

## Rv2628

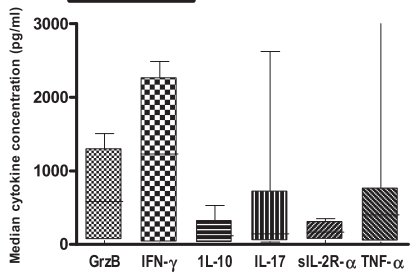

Supplement: MOESM1 [file 9446698]
